# Supplementary material for: In vitro anti-infective efficacy of green coffee bean extract against multidrug-resistant bacteria and in silico analysis for drug-like properties of bioactive compounds
Source: Research Square preprint supplement (doi:10.21203/rs.3.rs-8250187/v1), 2025-12-26
Supplement: Supplementary file 1 [file 29ca49f8c763776db9d69c04.docx]

Supplementary Table 1: Detection of ESβL production among laboratory isolates using the Double-disc synergy test

| Zone of growth inhibition (mm) is expressed as the mean of triplicate values | | | | | | | |
| --- | --- | --- | --- | --- | --- | --- | --- |
| **Isolates** | **CTX30** | **CEC30/10** | **Difference in zone size** | **CAZ 30** | **CAC30/10** | **Difference in zone size** | **Interpretation** |
| E. coli (PP800728) | 13 | 19 | 6 | R | 14 | - | ESBL positive |
| K. pneumoniae (PP808685) | R | 15 | - | 11 | 16 | 5 | ESBL positive |
| P. putida (PP808614) | 16 | 24 | 8 | 13 | 18 | 5 | ESBL positive |
| S. marcescens (PP808674) | 14 | 21 | 7 | 14 | 20 | 6 | ESBL positive |

*K. pneumoniae* ATCC 700603 was used as a positive control, *E. coli* ATCC 25922 was used as a negative control.

CTX30:Cefotaxime, CEC30/10: Cefotaxime + Clavulanic acid

CAZ 30: Ceftazidime,CAC30/10: Ceftazidime + Clavulanic acid

|  | |
| --- | --- |
|  |  | |  |
|  |  | |  |
|  |  | |  |
|  |  | |  |

Supplementary Table 2: Detection of carbapenemase production among laboratory isolates using the mCIM method

| Zone of growth inhibition (mm) is expressed as the mean of triplicate values | | |
| --- | --- | --- |
| **Isolates** | **MRP10** | **Interpretation** |
| E. coli (PP800728) | 12 | Carbapenemase producer |
| K. pneumoniae (PP808685) | 8 | Carbapenemase producer |
| P. putida (PP808614) | 11 | Carbapenemase producer |
| S. marcescens (PP808674) | 15 | Carbapenemase producer |

*K. pneumoniae* ATCC BAA- 1705 was used as a positive control, *and E. coli ATCC 25922* wasused as anindicator strain.

MRP10:Meropenem

Supplementary Table 3: Detection of *in vitro* biofilm-forming capacity of laboratory isolates by 96-well microtiter plate method (crystal violet assay)

| **Isolates** | **Mean OD590nm** | **±SD** | **Interpretation** |
| --- | --- | --- | --- |
| E. coli (PP800728) | 1.320667 | 0.719521 | Strong biofilm former |
| K. pneumoniae (PP808685) | 1.215 | 0.986413 | Strong biofilm former |
| P. putida (PP808614) | 0.713333 | 0.159516 | Strong biofilm former |
| S. marcescens (PP808674) | 0.815 | 0.347596 | Strong biofilm former |

*P. aerugionsa* (PAO1) was used as a positive control, and uninoculated LB broth served as a negative control.

Supplementary Table 4: Peak Report of GC-MS analysis of GBCA extract

| Peak# | R.Time | Area | Area% | Name |
| --- | --- | --- | --- | --- |
| 1 | 4.999 | 1038859 | 0.07 | 2,4-Dihydroxy-2,5-dimethyl-3(2H)-furan-3-one |
| 2 | 5.114 | 1257909 | 0.09 | 2-Hydroxy-gamma-butyrolactone |
| 3 | 5.816 | 1715111 | 0.12 | 3(2H)-Furanone, 4-hydroxy-5-methyl- |
| 4 | 6.066 | 1042170 | 0.07 | Furaneol |
| 5 | 6.195 | 1081988 | 0.07 | Acetophenone |
| 6 | 6.408 | 4109518 | 0.28 | 1,3,5-Triazine-2,4,6-triamine |
| 7 | 6.684 | 2644362 | 0.18 | PENTANAL |
| 8 | 7.240 | 3141843 | 0.22 | 2-ACETYL-2-HYDROXY-. GAMMA.-BUTYROLACTON |
| 9 | 7.453 | 8611734 | 0.60 | 4H-Pyran-4-one, 2,3-dihydro-3,5-dihydroxy-6-methyl- |
| 10 | 8.488 | 1229016 | 0.08 | 2,3-DIHYDRO-BENZOFURAN |
| 11 | 8.608 | 17577301 | 1.21 | 5-Hydroxymethylfurfural |
| 12 | 8.874 | 1952599 | 0.13 | 2-PROPANONE, 1-PHENYL- |
| 13 | 9.879 | 13586178 | 0.94 | 2-Methoxy-4-vinylphenol |
| 14 | 10.729 | 867234 | 0.06 | (3-Methoxyphenyl) acetonitrile |
| 15 | 11.554 | 24152472 | 1.67 | Benzaldehyde, 2-hydroxy-4-methyl- |
| 16 | 12.493 | 27861970 | 1.93 | GUANOSINE |
| 17 | 15.511 | 691983107 | 47.83 | 1,3,4,5-TETRAHYDROXY-CYCLOHEXANECARBOXYLIC ACID |
| 18 | 16.715 | 488818883 | 33.79 | 1,3,7-TRIMETHYL-3,7-DIHYDRO-1H-PURINE-2,6-DIO |
| 19 | 17.107 | 3340437 | 0.23 | HEXADECANOIC ACID, METHYL ESTER |
| 20 | 17.194 | 2120537 | 0.15 | Benzoic acid, 3,4,5-trihydroxy-, methyl ester |
| 21 | 17.287 | 3126944 | 0.22 | Pyrrolo[1,2-a] pyrazine-1,4-dione, hexahydro-3-(2-methylp |
| 22 | 17.503 | 35955888 | 2.49 | n-Hexadecanoic acid |
| 23 | 17.889 | 12826194 | 0.89 | 2-Propenoic acid, 3-(3,4-dihydroxyphenyl)-, methyl ester, |
| 24 | 18.740 | 6934361 | 0.48 | 9,12-Octadecadienoic acid (Z,Z)-, methyl ester |
| 25 | 18.798 | 799233 | 0.06 | 8,11,14-Docosatrienoic acid, methyl ester |
| 26 | 19.123 | 19616995 | 1.36 | 10(E),12(Z)-Conjugated linoleic acid |
| 27 | 19.169 | 4182614 | 0.29 | Oleic Acid |
| 28 | 19.358 | 2545176 | 0.18 | Octadecanoic acid |
| 29 | 20.392 | 983768 | 0.07 | cis-5,8,11-Eicosatrienoic acid, methyl ester |
| 30 | 20.808 | 478002 | 0.03 | 14-Oxononadec-10-enoic acid, methyl ester |
| 31 | 21.325 | 567729 | 0.04 | 4,25-SECOOBSCURINERVAN-4-OL, 22-ETHYL-15,16- |
| 32 | 22.243 | 3630209 | 0.25 | Isopimarol |
| 33 | 22.324 | 14235377 | 0.98 | Hexadecanoic acid, 2-hydroxy-1-(hydroxymethyl)ethyl ester |
| 34 | 22.385 | 854739 | 0.06 | Hexadecanoic acid, 2-hydroxy-1-(hydroxymethyl)ethyl ester |
| 35 | 22.486 | 1649110 | 0.11 | Homopterocarpin |
| 36 | 22.665 | 703970 | 0.05 | PREGN-5-EN-20-ONE, 3-(ACETYLOXY)-,(3.BETA.)- |
| 37 | 22.747 | 460963 | 0.03 | 5.BETA.-PREGN-16-EN-20-ONE, 3. BETA.-HYDROXY- |
| 38 | 22.961 | 598492 | 0.04 | 4-t-Butyl-2-[4-nitrophenyl] phenol |
| 39 | 23.039 | 792158 | 0.05 | Gibbane-1,10-dicarboxylic acid, 4a-hydroxy-1-methyl-8-m |
| 40 | 23.707 | 25203717 | 1.74 | 9,12-Octadecadienoic acid (Z,Z)-, 2,3-dihydroxypropyl ester |
| 41 | 23.897 | 2615613 | 0.18 | Octadecanoic acid, 2,3-dihydroxypropyl ester |
| 42 | 27.036 | 4035736 | 0.28 | 17-Pentatriacontene |
| 43 | 29.117 | 5877187 | 0.41 | 9-Octadecenoic acid, 1,2,3-propanetriyl ester, |

Supplementary Table 5: Binding affinities (kcal/mol**)** of target proteins with the ligands assessed through molecular docking

| Target Proteins | Quinic acid (L1) | Caffeine (L2) | Chlorogenic acid (L3) |
| --- | --- | --- | --- |
| NDM-1 (5YPK) | −7.3 | −6.4 | −10.8 |
| NorA (3WDO) | −6.6 | −8.2 | −8.4 |
| PilY1 (4OAR) | −7.1 | −6.2 | −9.3 |
| FimH (4BUQ) | −8.1 | −6.5 | −9.1 |
